# Supplementary material for: MULTI-PHACET: multidimensional clinical phenotyping of hospitalised acute COPD exacerbations
Source: PubMed Central journal article supplement — ERJ Open Res. 2021 Jul 12;7(3):00198-2021. doi: 10.1183/23120541.00198-2021 (PMC8273397; doi:10.1183/23120541.00198-2021), 2021-07-12
Supplement: 00198-2021.TABLES1.pdf [file 00198-2021.TABLES1.pdf]

**Supplementary Table 1. Characteristics of 10 most common phenotypes arranged in order of descending frequency**

|                                       | <b>BF</b>  | <b>AF</b>  | <b>B</b>  | <b>F</b>   | <b>BD</b>  | <b>EF</b>  | <b>E</b>  | <b>A</b>  | <b>CF</b>  | <b>X</b>   |
|---------------------------------------|------------|------------|-----------|------------|------------|------------|-----------|-----------|------------|------------|
| N                                     | 23         | 15         | 13        | 12         | 10         | 8          | 7         | 6         | 6          | 6          |
| Age                                   | 74±10      | 73±10      | 72±11     | 73±10      | 67±6       | 70±10      | 73±13     | 74±6      | 74±15      | 65±11      |
| Male (%)                              | 56.5       | 60.0       | 69.2      | 58.3       | 60.0       | 50.0       | 57.1      | 50.0      | 66.7       | 50.0       |
| Freq. (hospital) exac. (%)            | 43.5       | 13.3       | 38.5      | 33.3       | 50.0       | 25.0       | 42.9      | 16.7      | 16.7       | 16.7       |
| Current smoker (%)                    | 21.7       | 20.0       | 30.8      | 50.0       | 30.0       | 12.5       | 42.9      | 66.7      | 16.7       | 16.7       |
| FEV <sub>1</sub> (% predicted)        | 52±21      | 46±19      | 42±12     | 36±13      | 33±12      | 39±11      | 43±22     | 50±16     | 51±26      | 43±18      |
| TLCO (% predicted)                    | 34±13      | 38±10      | 37±10     | 35±15      | 29±10      | 41±18      | 43±22     | 46±22     | 35±18      | 34±19      |
| MRC-D                                 | 4[3-5]     | 3[3-5]     | 4[3-5]    | 4[4-5]     | 5[5-5]     | 3.5[2.5-5] | 5[3-5]    | 2[2-4]    | 3.5[3-4]   | 3.5[3-5]   |
| Days since symptom onset              | 3[1-7]     | 7[4-14]    | 7[4-14]   | 3[2-4]     | 5[3-7]     | 14[7-18]   | 4[2-7]    | 4[2-10]   | 6[2-7]     | 3.5[2-4]   |
| Prior contact with HCP (%)            | 43.4       | 73.3       | 61.5      | 41.7       | 80.0       | 62.5       | 71.4      | 83.3      | 100        | 66.7       |
| Pre-hospital antibiotics (%)          | 21.7       | 80.0       | 69.2      | 25.0       | 30.0       | 50.0       | 42.9      | 16.7      | 66.7       | 16.7       |
| Pre-hospital OCS (%)                  | 26.1       | 4.7        | 23.1      | 25.0       | 20.0       | 12.5       | 14.3      | 33.3      | 50.0       | 16.7       |
| CAT total                             | 25[22-30]  | 31[25-34]  | 25[22-33] | 29[26-31]  | 35[33-37]  | 29[26-33]  | 32[23-33] | 31[26-37] | 30[28-37]  | 31[30-32]  |
| HADS total                            | 12[8-18]   | 14[11-21]  | 15[10-18] | 16[12-19]  | 29[19-32]  | 22[19-23]  | 10[9-17]  | 20[14-22] | 12.5[7-14] | 6.5[6-9]   |
| BAP-65 Class                          | 3[2-3]     | 3[2-3]     | 2[2-3]    | 3[2-3]     | 3[2-3]     | 2[1-3]     | 3[2-3]    | 3[2-3]    | 2[2-3]     | 2[2-3]     |
| Neutrophils                           | 9.4±5      | 8.7±3      | 12.4±10   | 7.6±3.2    | 10.9±5.7   | 6.0±1.5    | 6.6±2     | 8.0±2.6   | 11.4±2.5   | 7.6±2      |
| Eosinophils                           | 0.03       | 0.01       | 0.01      | 0.1        | 0.04       | 0.43       | 0.33      | 0.05      | 0.09       | 0.07       |
|                                       | [0.0-0.1]  | [0.0-0.1]  | [0-0.1]   | [0.0-0.15] | [0.0-0.09] | [0.35-0.8] | [0.3-0.8] | [0.0-0.2] | [0.0-0.16] | [0.01-0.1] |
| CRP (mg/dL)                           | 49         | 34         | 108       | 5          | 51         | 3          | 2         | 42        | 113        | 8          |
|                                       | [30-107]   | [8-64]     | [52-176]  | [2-11]     | [42-54]    | [2-4]      | [1-4]     | [39-45]   | [67-160]   | [4-12]     |
| pH                                    | 7.38±0.1   | 7.31±0.1   | 7.35±0.1  | 7.33±0.1   | 7.37±0.1   | 7.31±0.1   | 7.29±0.0  | 7.39±0.0  | 7.4±0.0    | 7.36±0.1   |
| P <sub>v</sub> CO <sub>2</sub> (mmHg) | 48±12      | 50±10      | 45±7      | 54±14      | 50±10      | 58±12      | 59±14     | 43±6      | 42±6       | 51±20      |
| NT-proBNP (ng/L)                      | 618        | 1190       | 159       | 1090       | 108        | 357        | 142       | 116       | 416        | 139        |
|                                       | [387-2242] | [439-1503] | [113-195] | [341-2342] | [101-127]  | [263-4820] | [111-157] | [63-191]  | [350-2580] | [88-162]   |
| Hs-TnI (ng/L)                         | 18[7-38]   | 23[8-310]  | 5[3-10]   | 13[6-23]   | 7[4-8]     | 12[6-49]   | 5[3-5]    | 6[4-13]   | 34[4-74]   | 6[5-10]    |
| NIV (ED) %                            | 8.7        | 20.0       | 23.1      | 41.7       | 20.0       | 50.0       | 42.9      | 16.7      | 0.0        | 16.7       |
| NIV (ward) %                          | 4.3        | 26.7       | 7.7       | 41.7       | 0.0        | 12.5       | 14.3      | 16.7      | 0.0        | 16.7       |
| Mechanical ventilation (%)            | 8.7        | 6.7        | 0.0       | 0.0        | 0.0        | 12.5       | 0.0       | 0.0       | 0.0        | 0.0        |
| Length of stay                        | 5[4-7]     | 9[6-13]    | 5[3-8]    | 7[5-8]     | 6[4-11]    | 4[3-5]     | 3[3-4]    | 6[4-9]    | 6[5-7]     | 7[4-13]    |
| Mortality at 12 months (%)            | 21.7       | 13.3       | 23.1      | 33.3       | 20.0       | 25.0       | 0.0       | 0.0       | 0.0        | 16.7       |

\*Data shown as (%), mean±SD, median[IQR]
