# Supplementary material for: MULTI-PHACET: multidimensional clinical phenotyping of hospitalised acute COPD exacerbations
Source: PubMed Central journal article supplement — ERJ Open Res. 2021 Jul 12;7(3):00198-2021. doi: 10.1183/23120541.00198-2021 (PMC8273397; doi:10.1183/23120541.00198-2021), 2021-07-12
Supplement: 00198-2021.TABLES2.pdf [file 00198-2021.TABLES2.pdf]

**Supplementary Table S2. Viruses and bacteria identified in 146 patients with AECOPD**

| <b>Virus only</b> | <b>n</b>  | <b>Bacteria only</b>     | <b>n</b>  | <b>Virus with Bacteria</b>   | <b>n</b> |
|-------------------|-----------|--------------------------|-----------|------------------------------|----------|
| Rhinovirus        | 12        | Pseudomonas. aeruginosa. | 7         | Rhinovirus/Strep. pneumoniae | 2        |
| HMPV              | 8         | Haemophilus. influenzae  | 9         | Rhinovirus/Pseudomonas       | 2        |
| Influenza A       | 7         | Strep. pneumoniae        | 3         | RSV/Streptococcus            | 2        |
| RSV               | 3         | Moraxella catarrhalis    | 3         | Influenza A /Pseudomonas     | 1        |
| Influenza B       | 2         | MRSA                     | 1         | HMPV/Moraxella               | 1        |
| Adenovirus        | 0         | MSSA                     | 1         | <b>Total</b>                 | <b>8</b> |
| Parainfluenza 1   | 1         | Pseudomonas + MRSA       | 1         |                              |          |
| Parainfluenza 2   | 1         | <b>Total</b>             | <b>25</b> |                              |          |
| Rhinovirus/HMPV   | 1         |                          |           |                              |          |
| <b>Total</b>      | <b>35</b> |                          |           |                              |          |

HMPV= human metapneumovirus, RSV= respiratory syncytial virus, MRSA= methicillin resistant staphylococcus aureus, MSSA= methicillin sensitive staphylococcus aureus
