# Supplementary material for: MULTI-PHACET: multidimensional clinical phenotyping of hospitalised acute COPD exacerbations
Source: PubMed Central journal article supplement — ERJ Open Res. 2021 Jul 12;7(3):00198-2021. doi: 10.1183/23120541.00198-2021 (PMC8273397; doi:10.1183/23120541.00198-2021), 2021-07-12
Supplement: 00198-2021.TABLES3.pdf [file 00198-2021.TABLES3.pdf]

**Supplementary Table S3.** HADS scores within subgroups with or without psychological comorbidity

|                           | <b>Overall<br/>Population<br/>(n=136)</b> | <b>Anxiety*<br/>(n=34)</b> | <b>Depression*<br/>(n=32)</b> | <b>Alcohol<br/>Misuse<br/>(n=11)</b> | <b>None<br/>(n=83)</b> |
|---------------------------|-------------------------------------------|----------------------------|-------------------------------|--------------------------------------|------------------------|
| Male, n (%)               | 85 (62.5)                                 | 19 (55.9)                  | 14 (43.8)                     | 8 (72.7)                             | 55 (66.3)              |
| Antidepressant, n (%)     | 35 (25.7)                                 | 23 (67.6)                  | 28 (87.5)                     | 7 (63.6)                             | 1 (1.2)                |
| HADS Anxiety (mean/SD)    | 8.8/5.1                                   | 10.6/5.4                   | 11.8/5.1                      | 10.7/5.7                             | 7.6/4.6                |
| HADS Depression (mean/SD) | 8.1/5.0                                   | 11/5.1                     | 10.6/4.8                      | 10.1/4.1                             | 6.9/4.7                |
| HADS Total (mean/SD)      | 16.8/8.8                                  | 21.1/8.9                   | 21.8/8.4                      | 19.3/8.4                             | 14.6/8.1               |

\*patients with comorbid anxiety/depression are included in both categories
