# Supplementary material for: MULTI-PHACET: multidimensional clinical phenotyping of hospitalised acute COPD exacerbations
Source: PubMed Central journal article supplement — ERJ Open Res. 2021 Jul 12;7(3):00198-2021. doi: 10.1183/23120541.00198-2021 (PMC8273397; doi:10.1183/23120541.00198-2021), 2021-07-12
Supplement: 00198-2021.TABLES4.pdf [file 00198-2021.TABLES4.pdf]

**Supplementary Table S4. Cardiac biomarker measurements in patients with and without a history of cardiovascular disease.**

| n(%), median [IQR] | Overall           |                   |                   | Heart Failure     | No known cardiovascular disorder* |
|--------------------|-------------------|-------------------|-------------------|-------------------|-----------------------------------|
|                    | Population        | HTN               | IHD               |                   |                                   |
| n                  | 119               | 52                | 31                | 25                | 47                                |
| hs-TnI             | 9 [5-24]          | 10 [6-30.5]       | 9 [5-23]          | 16.5 [6-36]       | 7 [4-16]                          |
| hs-TnI >ULN,       | 32 (26.9)         | 18 (34.0)         | 8 (25.8)          | 11 (44.0)         | 9 (19.1)                          |
| NT-proBNP (ng/L)   | 368<br>[162-1201] | 422<br>[174-1545] | 422<br>[185-1545] | 618<br>[185-2016] | 258<br>[117-693]                  |
| NT-proBNP>ULN,     | 83 (69.7)         | 38 (71.7)         | 23 (74.2)         | 19 (75.9)         | 34 (72.3)                         |

HTN= hypertension, IHD= ischaemic heart disease, \*no known history of hypertension, ischaemic heart disease, heart failure, cerebrovascular disease or arrhythmia
