# Supplementary material for: MULTI-PHACET: multidimensional clinical phenotyping of hospitalised acute COPD exacerbations
Source: PubMed Central journal article supplement — ERJ Open Res. 2021 Jul 12;7(3):00198-2021. doi: 10.1183/23120541.00198-2021 (PMC8273397; doi:10.1183/23120541.00198-2021), 2021-07-12
Supplement: 00198-2021.TABLES5.pdf [file 00198-2021.TABLES5.pdf]

**Supplementary Table 5- Characteristics of patients who did versus did not undergo follow-up outpatient (stable) assessment.**

| <b>Demographics<br/>(mean±SD), median[IQR]</b>                                 | <b>Follow up</b> | <b>No follow up</b> | <b>p</b> |
|--------------------------------------------------------------------------------|------------------|---------------------|----------|
| Age                                                                            | 70.7±10.7        | 72.5±10.3           | 0.33     |
| Male (%)                                                                       | 58.2             | 64.9                | 0.69     |
| BMI kg/m <sup>2</sup>                                                          | 26.1±5.6         | 24.4±5.7            | 0.09     |
| FEV <sub>1</sub> (% predicted)                                                 | 46.2±19.9        | 50.0±18.5           | 0.4      |
| TLCO (% predicted)                                                             | 39.6±16          | 38.3±16.7           | 0.67     |
| MRC-D                                                                          | 4 [3-5]          | 3 [4-5]             | 0.35     |
| Current smoker (%)                                                             | 34.3             | 29.9                | 0.33     |
| Pack years                                                                     | 43.3±24.9        | 44.7±28.8           | 0.75     |
| IHD (%)                                                                        | 19.4             | 33.8                | 0.053    |
| Cardiac failure (%)                                                            | 14.9             | 23.4                | 0.2      |
| Diabetes (%)                                                                   | 22.4             | 16.9                | 0.4      |
| Malignancy* (%)                                                                | 10.5             | 7.8                 | 0.58     |
| Anxiety (%)                                                                    | 14.9             | 29.9                | 0.03*    |
| Depression (%)                                                                 | 20.9             | 26.0                | 0.47     |
| Frequent exacerbators (%)<br>(≥ 2 AECOPD hospital<br>admissions in prev. year) | 23.9             | 32.5                | 0.26     |

\*receiving treatment or palliation
